# Supplementary material
Source: Springer Nature journal article supplement (https://www.springermedizin.de/resource/supplementary/12984_2006_113_MOESM7_ESM.pdf/9605332)
Supplement: MOESM7 [file 9605332]

**Table 5** Correlation coefficient (Pearson) between  $\rho_{\max\_ratio}$  and differences in the scores of questionnaire

| $\rho_{\max}$ | correlation coefficient | level of significance |
|---------------|-------------------------|-----------------------|
| movie A       | 0.32                    | 0.161                 |
| movie D       | 0.16                    | 0.491                 |
| movie R       | -0.42                   | 0.059                 |
